# Supplementary material for: Plumbagin protects liver against fulminant hepatic failure and chronic liver fibrosis via inhibiting inflammation and collagen production
Source: PubMed Central journal article supplement (PMC5347738; doi:10.18632/oncotarget.12655), 2016-10-14
Supplement: oncotarget-07-82864-s001.pdf [file oncotarget-07-82864-s001.pdf]

## **Plumbagin protects liver against fulminant hepatic failure and chronic liver fibrosis via inhibiting inflammation and collagen production**

### **SUPPLEMENTARY DATA**

#### **Western blotting**

Total protein from RAW264.7 cells were extracted using RIPA Lysis Buffer (Beijing Biomed) and the protease inhibitor PMSF. Cell lysates were separated using SDS-PAGE and transferred to Immobilon-P membranes (Millipore). Membranes were incubated with primary

antibodies for p-p65 (Cell Signaling Technology) and GAPDH (Santa Cruz Biotechnology) followed by HRP-conjugated secondary antibodies (1:2,000; Sungene Biotech Co., Ltd) that were specific to the species of the primary antibodies.

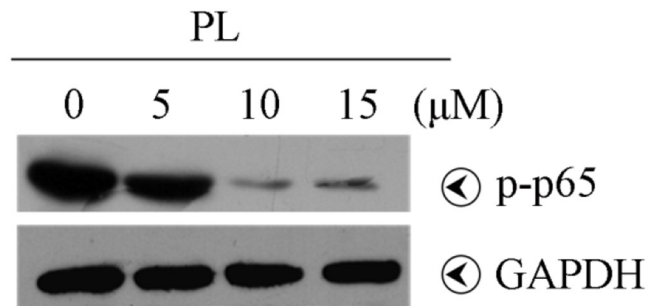

**Supplementary Figure S1: The effects of plumbagin on NF-κB signal.** The NF-κB signal (marked as p-p65) in RAW264.7 cells was suppressed by plumbagin treatment for 1 h at the indicated concentrations. Representative images are shown.

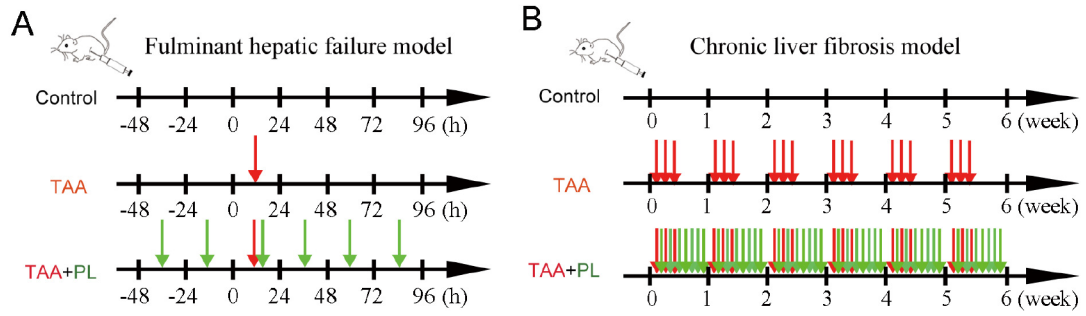

**Supplementary Figure S2: Diagram of the experimental model.** A. The FHF model. B. The chronic liver fibrosis model. TAA, red arrow; PL (plumbagin), green arrow.

**Supplementary Table S1: Necroinflammatory scores system (Ishak, et al, 1995)**

| <b>A</b>                                                        | <b>Score</b> | <b>Pathology</b>                                                                  |
|-----------------------------------------------------------------|--------------|-----------------------------------------------------------------------------------|
| Periportal or periseptal interface hepatitis                    | 0            | Absent                                                                            |
| (piecemeal necrosis)                                            | 1            | Mild (focal, few portal areas)                                                    |
|                                                                 | 2            | Mild/moderate (focal, most portal areas)                                          |
|                                                                 | 3            | Moderate around less than 50% of tracts or septa/P-P bridging necrosis)           |
|                                                                 | 4            | Severe (continuous around more than 50% of tracts or septa/P-P bridging necrosis) |
| <b>B</b>                                                        | <b>Score</b> | <b>Pathology</b>                                                                  |
| Confluent necrosis                                              | 0            | Absent                                                                            |
|                                                                 | 1            | Focal confluent necrosis                                                          |
|                                                                 | 2            | Zone 3 necrosis in some areas                                                     |
|                                                                 | 3            | Zone 3 necrosis in most areas                                                     |
|                                                                 | 4            | Zone 3 necrosis, plus occasional portal-central (P-C) bridging                    |
|                                                                 | 5            | Zone 3 necrosis, plus multiple P-C bridging                                       |
|                                                                 | 6            | Panacinar or multiacinar necrosis                                                 |
| <b>C</b>                                                        | <b>Score</b> | <b>Pathology</b>                                                                  |
| Focal (spotty) lytic necrosis, apoptosis and focal inflammation | 0            | Absent                                                                            |
|                                                                 | 1            | One focus or less per 10× objective (ob)                                          |
|                                                                 | 2            | Two to four foci per 10× ob                                                       |
|                                                                 | 3            | Five to ten foci per 10× ob                                                       |
|                                                                 | 4            | More than ten foci per 10× ob                                                     |
| <b>D</b>                                                        | <b>Score</b> | <b>Pathology</b>                                                                  |
| Portal inflammation                                             | 0            | None                                                                              |
|                                                                 | 1            | Mild, some or all portal areas                                                    |
|                                                                 | 2            | Moderate, some or all portal areas                                                |
|                                                                 | 3            | Moderate/marked, all portal areas                                                 |
|                                                                 | 4            | Marked, all portal areas                                                          |

Necroinflammatory scores=A+B+C+D.

**Supplementary Table S2: Ishak index for staging of liver fibrosis**

| <b>Score</b> | <b>pathology</b>                                                              |
|--------------|-------------------------------------------------------------------------------|
| 0            | No fibrosis                                                                   |
| 1            | Some portal tract fibrotic ± short fibrous septa                              |
| 2            | Most portal tract fibrotic ± short fibrous septa                              |
| 3            | Most portal tract fibrotic with Occasional P-P bridging                       |
| 4            | Portal tract fibrotic with marked P-P and P-C bridging                        |
| 5            | Marked P-P and/or P-C bridging with occasional nodules (incomplete cirrhosis) |
| 6            | Cirrhosis (probable or definite)                                              |

Supplementary Table S3: Primers for PCR with LX-2 cells

| Genes              |                | Sequences               |
|--------------------|----------------|-------------------------|
| Homo sapiens GAPDH | Forward Primer | GGAGCGAGATCCCTCCAAAAT   |
|                    | Reverse Primer | GGCTGTTGTCATACTTCTCATGG |
| COL-1              | Forward Primer | GAGGGCCAAGACGAAGACATC   |
|                    | Reverse Primer | CAGATCACGTCATCGCACAAAC  |
| COL-3              | Forward Primer | TTGAAGGAGGATGTTCCCATCT  |
|                    | Reverse Primer | ACAGACACATATTTGGCATGGTT |
| $\alpha$ -SMA      | Forward Primer | CTATGAGGGCTATGCCTTGCC   |
|                    | Reverse Primer | GCTCAGCAGTAGTAACGAAGGA  |
